# Supplementary material for: Hemostasis Proteins in Invasive Meningococcal and Nonmeningococcal Infections: A Prospective Multicenter Study
Source: PubMed Central journal article supplement — Pediatr Crit Care Med. 2022 Aug 31;23(12):e543–54. doi: 10.1097/PCC.0000000000003056 (PMC9708080; doi:10.1097/pcc.0000000000003056), 2022-08-31
Supplement: pcc-23-e543-s001.pdf [file pcc-23-e543-s001.pdf]

## Appendix

### Appendix 1 - Overview of coagulation proteins and their relation with paediatric sepsis and childhood mortality in literature

|                                               | Paediatric sepsis*   | Non-survivors^ | References |
|-----------------------------------------------|----------------------|----------------|------------|
| <b>Common pathway</b>                         |                      |                |            |
| Fibronectin                                   | ↓                    | ↓              | [1, 2]     |
| <b>Contact activation (intrinsic) pathway</b> |                      |                |            |
| Factor IX                                     | No data <sup>±</sup> | No data        | [3]        |
| <b>Protein C pathway</b>                      |                      |                |            |
| Protein C                                     | ↓                    | ↓              | [4-6]      |
| Protein S                                     | ↓                    | ↓              | [4, 5]     |
| Thrombomodulin                                | ↑                    | ↑              | [4, 7, 8]  |
| <b>Platelet adhesion</b>                      |                      |                |            |
| ADAMTS-13                                     | ↓                    | ↓              | [9, 10]    |
| vWF                                           | ↑                    | ↑              | [10]       |
| <b>Fibrinolysis</b>                           |                      |                |            |
| PAI-1                                         | ↑                    | ↑              | [11-13]    |

\*Compared to controls; ^Compared to survivors; <sup>±</sup> Only literature in adults

ADAMTS-13, a disintegrin and metalloprotease with thrombospondin type-1 motives; PAI-1, plasminogen activator inhibitor type 1; vWF, von Willebrand Factor

## Appendix 2 – Flowchart of patient selection

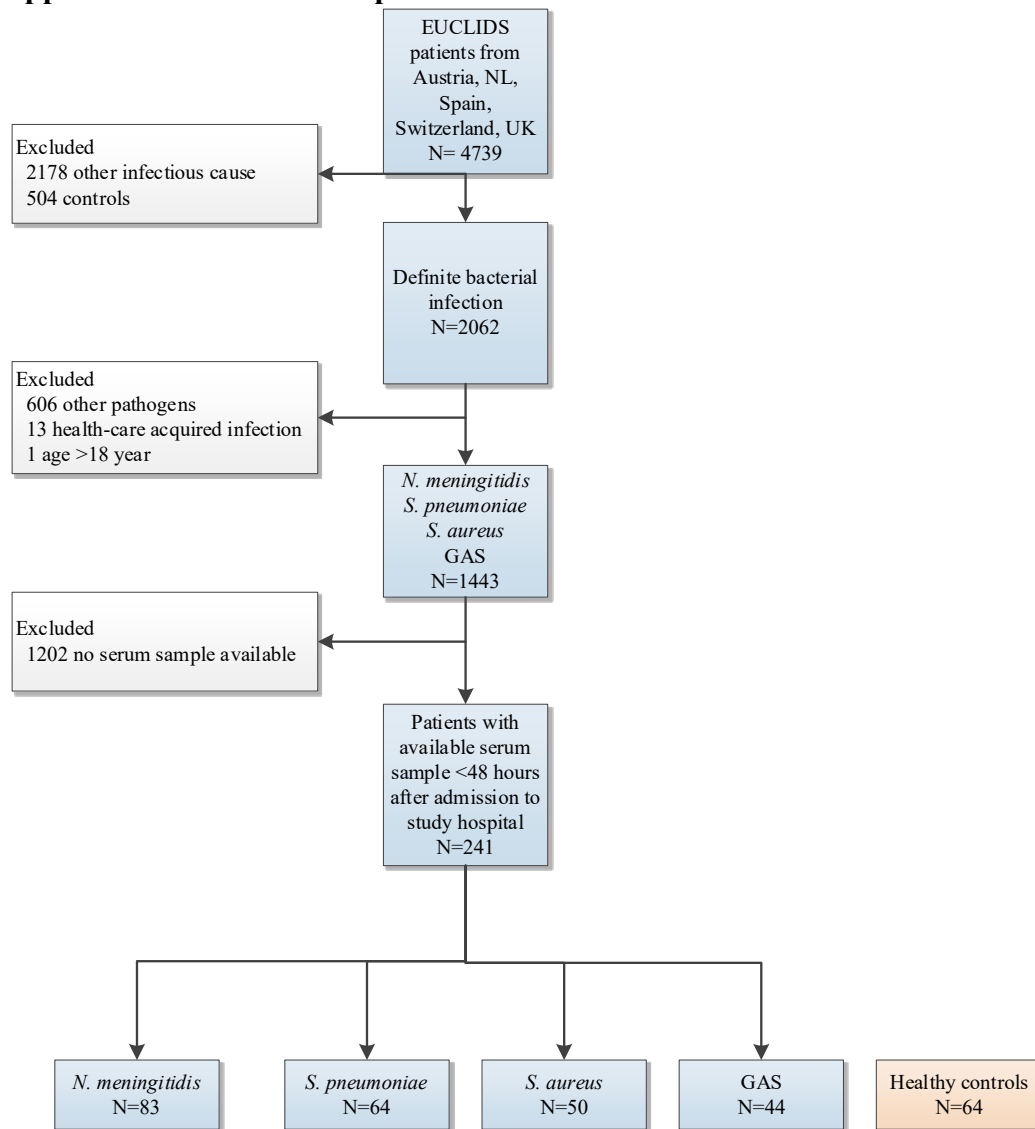

EUCLIDS, European Union Childhood Life-threatening Infectious Disease study; GAS, group A streptococcus; NL, the Netherlands; UK, United Kingdom

### Appendix 3 – Descriptive characteristics healthy controls vs invasive bacterial infections

|                            | <b>Invasive bacterial infections</b> | <b>Healthy controls</b> |                |
|----------------------------|--------------------------------------|-------------------------|----------------|
|                            | <b>n=241</b>                         | <b>n=64</b>             | <b>P-value</b> |
| Female                     | 110 (45.6)                           | 30 (46.9)               | 0.97           |
| Age in years, median [IQR] | 3.3 (1.3-9.2)                        | 5.4 (3.1-12.3)          | <0.01          |
| Ethnicity*                 |                                      |                         | 0.22           |
| European                   | 185 (76.8)                           | 47 (73.4)               |                |
| Asian                      | 13 (5.4)                             | 4 (6.3)                 |                |
| African                    | 12 (4.9)                             | 8 (12.5)                |                |
| Other                      | 20 (8.3)                             | 4 (1.7)                 |                |

\*Available data: Invasive bacterial infections n=230, healthy controls n=63

IQR, interquartile range

#### Appendix 4 – Levels of haemostasis proteins

Table Appendix 4A – Invasive bacterial infections vs healthy controls

|                        | Invasive bacterial infections | Healthy controls | P-value § |
|------------------------|-------------------------------|------------------|-----------|
|                        | n=241                         | n=64             |           |
| Serum                  | median (IQR)                  | median (IQR)     |           |
| Fibronectin (ug/ml)    | 41 (15 - 103)                 | 106 (19-228)     | 0.02      |
| PAI-1 (ng/ml)          | 96 (30 - 197)                 | 77 (34-97)       | 0.00      |
| Thrombomodulin (pg/ml) | 10 (10 - 1490)*               | 10 (10-10)       | 0.00      |
| ADAMTS13 (ng/ml)       | 21 (2-61)^                    | 7 (2-17)         | 0.00      |
| <b>Citrate plasma</b>  | <b>n=122</b>                  | <b>n=20</b>      |           |
| Factor IX (%)          | 60 (35 - 300)                 | 40 (34-116)      | 0.36      |
| Protein C (%)          | 40 (25 -65)                   | 65 (54-89)       | 0.00      |
| Protein S (%)          | 108 (65-315)                  | 165 (95-315)     | 0.08      |
| vWF (%)                | 300 (131 - 300)               | 88 (54-190)      | 0.00      |

\*n=239, ^n=240.

§ Adjusted for multiple testing.

ADAMTS-13, a disintegrin and metalloprotease with thrombospondin type-1 motives; IQR, interquartile range; PAI-1, plasminogen activator inhibitor type 1; vWF, von Willebrand Factor

**Figure Appendix 4A – Haemostasis protein levels in controls and patients with invasive bacterial infections**

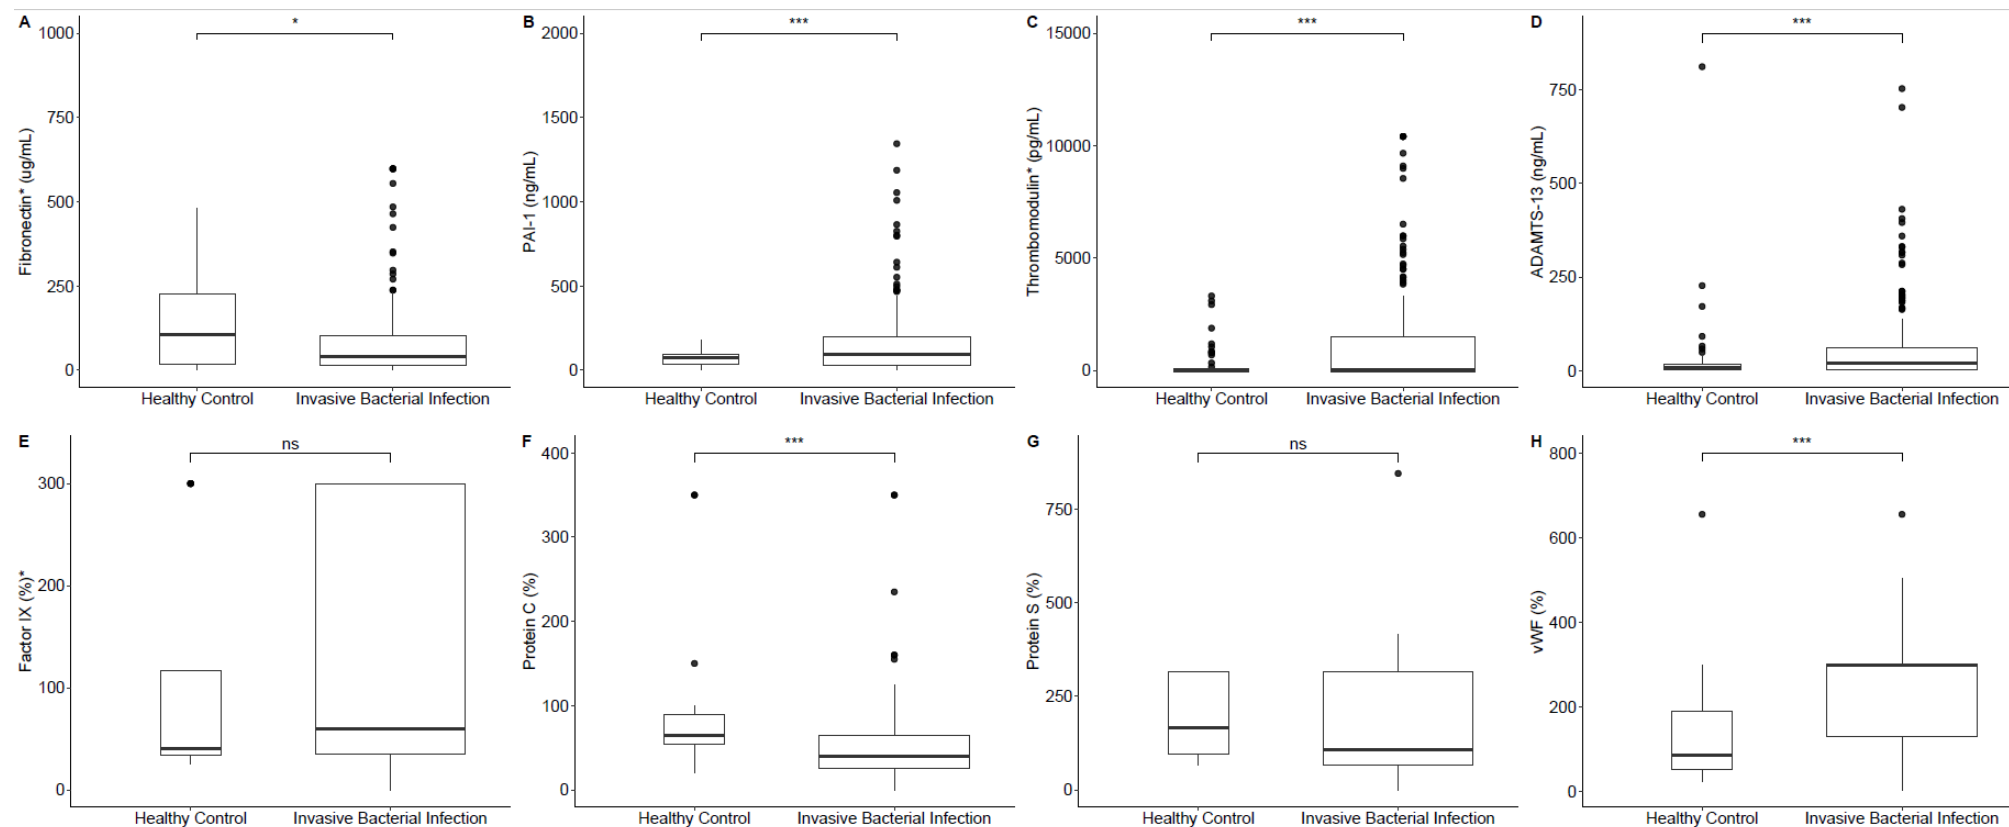

A, Fibronectin; B, PAI-1; C, Thrombomodulin; D, ADAMTS-13; E, Factor IX; F, Protein C; G, Protein S; H, vWF

\*Extreme values for Fibronectin, thrombomodulin and Factor IX were truncated to the 99<sup>th</sup> centile.

ns; not significant. \*\*p-value $\leq$ 0.05, \*\*\*p-value $\leq$ 0.001

p-values are adjusted for multiple testing.

**Table Appendix 4C – No invasive ventilation/inotropes vs need for invasive ventilation or inotropes**

|                        | <b>No invasive ventilation/inotropes n=118</b> | <b>Need for invasive ventilation or inotropes n=123</b> | <b>P-value*</b> |
|------------------------|------------------------------------------------|---------------------------------------------------------|-----------------|
| <b>Serum</b>           | median (IQR)                                   | median (IQR)                                            |                 |
| Fibronectin (ug/ml)    | 59 (26-131)                                    | 28 (9-74)                                               | 0.00            |
| PAI-1 (ng/ml)          | 110 (22-190)                                   | 86 (35-198)                                             | 0.65            |
| Thrombomodulin (pg/ml) | 10 (10-729)                                    | 640 (10-2641)                                           | 0.00            |
| ADAMTS13 (ng/ml)       | 16 (2-60)                                      | 27 (4-64)                                               | 0.44            |
| <b>Citrate plasma</b>  | <b>n=49</b>                                    | <b>n=73</b>                                             |                 |
| Factor IX (%)          | 110 (50-300)                                   | 50 (30-115)                                             | 0.01            |
| Protein C (%)          | 55 (35-80)                                     | 35 (25-55)                                              | 0.01            |
| Protein S (%)          | 160 (75-315)                                   | 90 (60-135)                                             | 0.03            |
| vWF (%)                | 300 (85-300)                                   | 300 (245-300)                                           | 0.06            |

\*Adjusted for multiple testing

ADAMTS-13, a disintegrin and metalloprotease with thrombospondin type-1 motives; IQR, interquartile range; PAI-1, plasminogen activator inhibitor type 1; vWF, von Willebrand Factor

## Appendix 5 - Haemostasis protein levels in controls and different pathogens

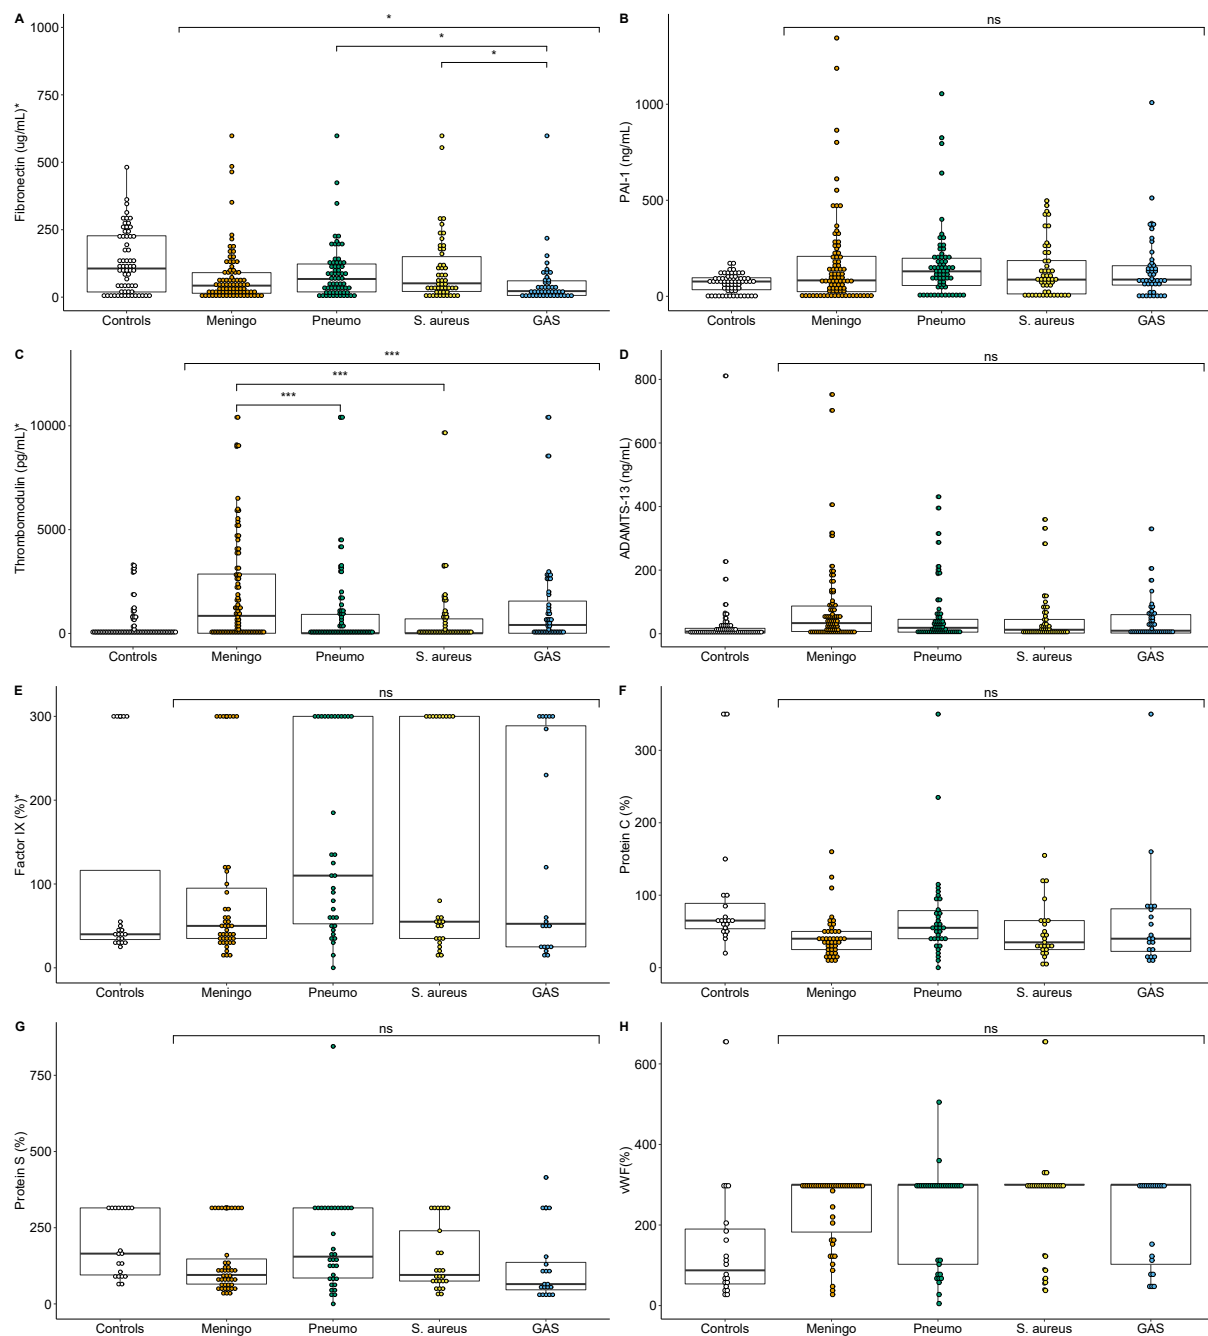

Legend:

A, Fibronectin; B, PAI-1; C, Thrombomodulin; D, ADAMTS-13; E, Factor IX; F, Protein C;

G, Protein S; H, vWF

\*Extreme values for Fibronectin, thrombomodulin and Factor IX were truncated to the 99<sup>th</sup>

centile. ns, not significant, \*p-value $\leq$ 0.05, \*\*p-value $\leq$ 0.01, \*\*\*p-value $\leq$ 0.001

p-values are adjusted for multiple testing.

**Appendix 6 - Haemostasis protein levels in controls, survivors and non-survivors**

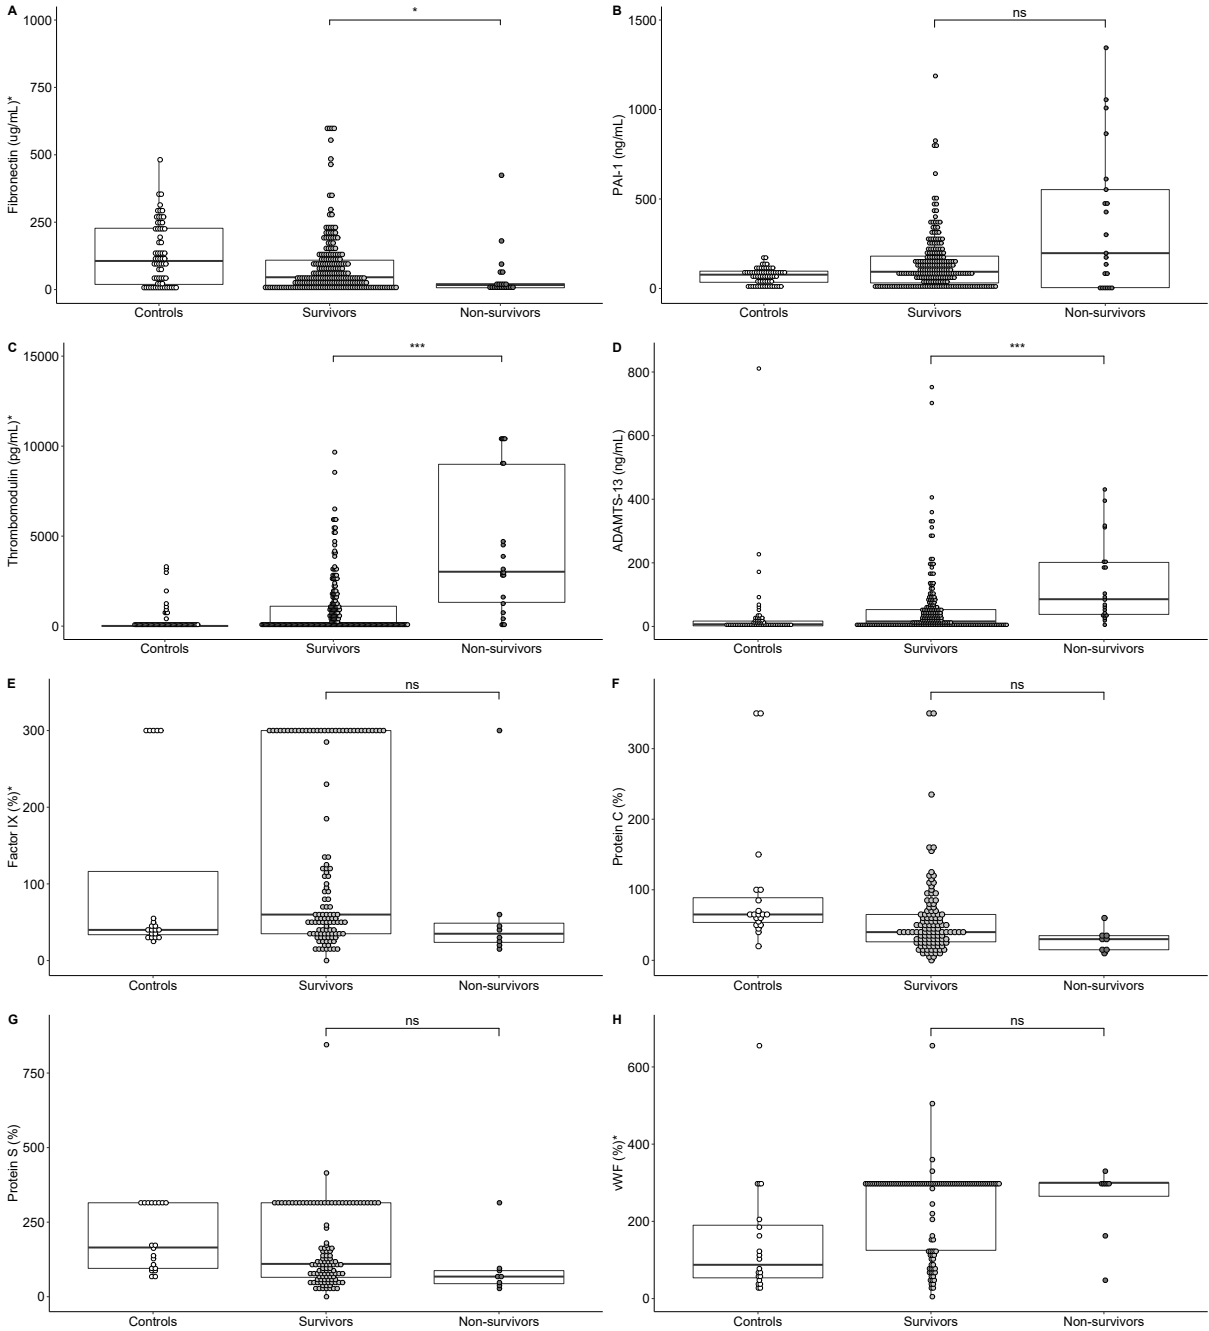

A, Fibronectin; B, PAI-1; C, Thrombomodulin; D, ADAMTS-13; E, Factor IX; F, Protein C; G, Protein S; H, vWF

\*Extreme values for Fibronectin, thrombomodulin and Factor IX were truncated to the 99<sup>th</sup> centile. ns, not significant, \*p-value≤0.05, \*\*p-value≤0.01, \*\*\*p-value≤0.001. p-values are adjusted for multiple testing.



**Appendix 7 - Correlation of coagulation proteins with PIM2 score in all invasive bacterial infections (n=241)**

|                | PIM2 score     |          |
|----------------|----------------|----------|
|                | Spearman's rho | P-value* |
| Fibronectin    | -0.25          | 0.00     |
| PAI-1          | -0.01          | 0.94     |
| Thrombomodulin | 0.2            | 0.02     |
| ADAMTS-13      | 0.13           | 0.15     |
| Factor IX      | -0.24          | 0.04     |
| Protein C      | -0.25          | 0.03     |
| Protein S      | -0.29          | 0.01     |
| vWF            | 0.14           | 0.25     |

\*P-values adjusted for multiple testing

ADAMTS-13, a disintegrin and metalloprotease with thrombospondin type-1 motives; IQR, interquartile range; PAI-1, plasminogen activator inhibitor type 1; vWF, von Willebrand Factor

Based on the Spearman's rho, significant correlations were classified as very weak (0-0.19), weak (0.2-0.39), moderate (0.4-0.59), strong (0.6-0.79) and very strong (0.8-1).[14]

**Appendix 8 – Characteristics of patients with available citrate plasma (n=122) and patients without available citrate plasma (n=110)**

|                                            | <b>All invasive bacterial infections<br/>n=241</b> | <b>Citrate plasma available<br/>n=122</b> | <b>Citrate plasma not available<br/>n=110</b> | <b>P-value</b> |
|--------------------------------------------|----------------------------------------------------|-------------------------------------------|-----------------------------------------------|----------------|
| <b>Severity of illness</b>                 |                                                    |                                           |                                               |                |
| Admitted to PICU                           | 177 (73.4)                                         | 103 (84.8)                                | 74 (62.2)                                     | <0.001         |
| Need for invasive ventilation or inotropes |                                                    | 73 (59.8)                                 | 50 (42.0)                                     | <0.01          |
| PIM2 score (%), median [IQR]               |                                                    | 3.5 (1.0-10.9)                            | 3.5 (0.8-11.7)                                | p=0.67         |
| Death                                      | 21 (8.7)                                           | 8 (6.6)                                   | 13 (10.9)                                     | 0.33           |
| <b>Pathogen</b>                            |                                                    |                                           |                                               |                |
| <i>Neisseria meningitidis</i>              | 83 (34.4)                                          | 43 (35.2)                                 | 40 (33.6)                                     | p=0.88         |
| <i>Streptococcus pneumoniae</i>            | 64 (26.6)                                          | 34 (27.9)                                 | 30 (25.2)                                     |                |
| <i>Staphylococcus aureus</i>               | 50 (20.7)                                          | 25 (20.5)                                 | 25 (21.0)                                     |                |
| <i>Group A streptococcus</i>               | 44 (18.3)                                          | 20 (16.4)                                 | 24 (20.2)                                     |                |

IQR, interquartile range; PICU, paediatric intensive care unit; PIM, paediatric index of mortality

## References

1. Blanco A, Guisasola JA, Solis P, Bachiller R, Gonzalez H: **Fibronectin in meningococcal sepsis. Correlation with antithrombin III and protein C.** *Acta Paediatr Scand* 1990, **79**(1):73-76.
2. Riordan FA, Bestwick K, Thomson AP, Sills JA, Hart CA: **Plasma fibronectin levels in meningococcal disease.** *Eur J Pediatr* 1997, **156**(6):451-453.
3. Moore JX, Zakai NA, Mahalingam M, Griffin RL, Irvin MR, Safford MM, Baddley JW, Wang HE: **Hemostasis biomarkers and risk of sepsis: the REGARDS cohort.** *J Thromb Haemost* 2016, **14**(11):2169-2176.
4. Faust SN, Levin M, Harrison OB, Goldin RD, Lockhart MS, Kondaveeti S, Laszik Z, Esmon CT, Heyderman RS: **Dysfunction of endothelial protein C activation in severe meningococcal sepsis.** *N Engl J Med* 2001, **345**(6):408-416.
5. Leclerc F, Hazelzet J, Jude B, Hofhuis W, Hue V, Martinot A, Van der Voort E: **Protein C and S deficiency in severe infectious purpura of children: a collaborative study of 40 cases.** *Intensive Care Med* 1992, **18**(4):202-205.
6. Samransamruajkit R, Hiranrat T, Prapphal N, Sritippayawan S, Deerojanawong J, Poovorawan Y: **Levels of protein C activity and clinical factors in early phase of pediatric septic shock may be associated with the risk of death.** *Shock* 2007, **28**(5):518-523.
7. Lin JJ, Hsiao HJ, Chan OW, Wang Y, Hsia SH, Chiu CH: **Increased serum thrombomodulin level is associated with disease severity and mortality in pediatric sepsis.** *PLoS One* 2017, **12**(8):e0182324.
8. Krafte-Jacobs B, Brill R: **Increased circulating thrombomodulin in children with septic shock.** *Crit Care Med* 1998, **26**(5):933-938.
9. Lin JJ, Chan OW, Hsiao HJ, Wang Y, Hsia SH, Chiu CH: **Decreased ADAMTS 13 Activity is Associated With Disease Severity and Outcome in Pediatric Severe Sepsis.** *Medicine (Baltimore)* 2016, **95**(16):e3374.
10. Bongers TN, Emonts M, de Maat MP, de Groot R, Lisman T, Hazelzet JA, Leebeek FW: **Reduced ADAMTS13 in children with severe meningococcal sepsis is associated with severity and outcome.** *Thromb Haemost* 2010, **103**(6):1181-1187.
11. Hermans PW, Hazelzet JA: **Plasminogen activator inhibitor type 1 gene polymorphism and sepsis.** *Clin Infect Dis* 2005, **41 Suppl 7**:S453-458.
12. Kornelisse RF, Hazelzet JA, Savelkoul HF, Hop WC, Suur MH, Borsboom AN, Risseuw-Appel IM, van der Voort E, de Groot R: **The relationship between plasminogen activator inhibitor-1 and proinflammatory and counterinflammatory mediators in children with meningococcal septic shock.** *J Infect Dis* 1996, **173**(5):1148-1156.
13. Green J, Doughty L, Kaplan SS, Sasser H, Carcillo JA: **The tissue factor and plasminogen activator inhibitor type-1 response in pediatric sepsis-induced multiple organ failure.** *Thromb Haemost* 2002, **87**(2):218-223.
14. Wechsler S: **Statistics at Square One. Ninth Edition, revised by M. J. Campbell, T. D. V. Swinscow, BMJ Publ. Group, London, 1996. No. of pages: 140. Price: £11. ISBN 0-7279-0916-9.** *Statistics in Medicine* 1997, **16**(22):2629-2630.
